1 **C19ORF66 broadly escapes viral-induced endonuclease cleavage and restricts Kaposi's**

2 **Sarcoma Associated Herpesvirus (KSHV)**

3

4 William Rodriguez<sup>1</sup>, Aman Srivastav<sup>1</sup>, Mandy Muller<sup>1\*</sup>

5 <sup>1</sup>Microbiology department, University of Massachusetts, Amherst

6 \*corresponding author: [mandymuller@umass.edu](mailto:mandymuller@umass.edu)

7

8

## 9 **ABSTRACT**

10 One striking characteristic of certain herpesviruses is their ability to induce rapid and  
11 widespread RNA decay in order to gain access to host resources. This phenotype is induced by  
12 viral endoribonucleases, including SOX in KSHV, muSOX in MHV68, BGLF5 in EBV and vhs in  
13 HSV-1. Here, we performed comparative RNA-seq upon expression of these herpesviral  
14 endonucleases in order to characterize their effect on the host transcriptome. Consistent with  
15 previous reports, we found that approximately two thirds of transcripts are downregulated in  
16 cells expressing any of these viral endonucleases. Among transcripts spared from degradation,  
17 we uncovered a cluster of transcripts that systematically escape degradation from all tested  
18 endonucleases. Among these escapees, we identified C19ORF66 and reveal that like the  
19 previously identified escapees, this transcript is protected from degradation by its 3'UTR. We  
20 then show that C19ORF66, a known anti-viral protein, is a potent KSHV restriction factor,  
21 suggesting that its ability to escape viral cleavage may be an important component of the host  
22 response to viral infection. Collectively, our comparative approach is a powerful tool to pinpoint  
23 key regulators of the viral-host interplay and led us to uncover a novel KSHV regulator.

24

25

26

## 27 INTRODUCTION

28 Many viruses including alpha- and gammaherpesviruses, influenza A virus, and SARS  
29 coronavirus induce widespread mRNA decay through the use of virally encoded endonucleases  
30 (1-5). This process, known as “host shutoff”, allows viruses to rapidly restrict gene expression in  
31 order to dampen immune responses and provide access to the host’s resources for viral  
32 replication (2,6,7). One well-studied viral endonuclease is the SOX protein encoded by Kaposi’s  
33 sarcoma-associated herpesvirus (KSHV). SOX is conserved throughout the herpesvirus family,  
34 but only gammaherpesviral SOX homologs display ribonuclease activity in cells (8-10) and  
35 studies indicate that SOX activity is important for the *in-vivo* viral lifecycle (11,12). Although SOX  
36 targets a degenerate RNA motif present on most mRNA (13-15), multiple studies have shown  
37 that some transcripts robustly escape SOX-induced decay (16-21). Studying these ‘escapees’ in  
38 aggregate is complicated, however, by the fact that multiple mechanisms can promote apparent  
39 escape. These include lack of a targeting motif, indirect transcriptional effects, and active  
40 evasion of ribonucleolytic cleavage (16,20-24). This latter phenotype, termed “dominant  
41 escape”, is particularly notable as it involves a specific RNA element whose presence in the 3’  
42 UTR of an mRNA protects against SOX cleavage, regardless of whether the RNA contains a  
43 targeting motif (19-21). This protective RNA element was termed SRE (for SOX Resistance  
44 Element), but we recently showed that the SRE is also effective against a broad range of viral  
45 endonucleases. Perhaps more surprisingly, the SRE is unable to restrict endonucleolytic  
46 cleavage originating from a cellular endonuclease, making it the first identified viral-specific  
47 ribonuclease escape element(19). We showed that this broad-acting RNA element is not  
48 characterized by a defined sequence motif (19) rendering it difficult to identify new escaping  
49 transcripts by traditional sequence search. Consequently, the host vs. viral endonuclease  
50 dichotomy to only defining characteristic of this novel type of RNA element.

51 Little is currently known about these types of RNA elements; how widespread they may  
52 be in the genome and how they may contribute to the overall viral-host arms race for the control  
53 of resources. To date, only two SRE-bearing dominant escapees are known: the host  
54 interleukin-6 (IL-6) (18,20,21) and the growth arrest and DNA damage-inducible 45 beta  
55 (GADD45B) (19) transcripts. Both the IL-6 and GADD45B SREs were mapped to their 3'UTR  
56 and were shown to protect against an array of viral – but not host – RNAses. Furthermore, while  
57 little sequence homology was detected among these SREs, we showed that they share  
58 similarity in their secondary structure; reinforcing the idea the SRE may function as a platform to  
59 recruit a protective protein complex as previously observed (19-21). Functionally, while the  
60 beneficial role of IL-6 for KSHV during infection is well documented (25-33), the role of  
61 GADD45B is still unclear. In fact, GADD45B is repressed during KSHV latency (34) and  
62 GADD45B known pro-apoptotic roles may indicate that this transcript escapes to participate in  
63 an anti-viral response to host shutoff.

64 Here, taking advantage of the ability of the SRE element to block decay from a diverse  
65 set of viral endonucleases, we sought to identify novel escaping mRNAs containing SRE or  
66 SRE-like elements in the transcriptome. Using comparative RNA-seq, we uncovered a cluster of  
67 75 host mRNAs that escape degradation from four herpesviral endonucleases. Similarly to the  
68 previously identified SRE-bearing transcripts, these transcripts were spared from a range of viral  
69 – but not host – endonucleases, further supporting that our approach successfully identified  
70 novel dominant escapees. Among this list of newly identified escapees, we demonstrate that our  
71 top candidate, C19ORF66, is a negative regulator of the KSHV life cycle.

72 C19orf66 (also annotated RyDEN, IRAV, and SVA-1) is an interferon stimulated gene  
73 (ISG) that has been found to be upregulated upon infection by a number a viruses (35-40),  
74 including herpesviruses (41,42) in several large scale screens. Recently, C19ORF66 was  
75 demonstrated to repress Dengue Virus (DENV) replication and gene expression by interacting

76 with the cytoplasmic poly-A binding protein, PABPC (43), and the RNA helicase MOV10 (44)  
77 suggesting that C19ORF66 may restrict DENV infection by either directly influencing the host  
78 gene expression machinery, and/or directly targeting viral RNA for degradation, making it an  
79 intriguing candidate dominant escapees during KSHV infection.

80         Here we show that C19ORF66 is upregulated during KSHV infection and accumulates  
81 over the course of 96 hours post-reactivation. Knocking down C19ORF66 during KSHV infection  
82 leads to higher expression levels of early and delayed early viral genes, which results in higher  
83 yields of infectious viral particles and suggests that C19ORF66 has anti-viral activity on KSHV.  
84 Taken together, these results demonstrate that SRE and SRE-like elements may be more  
85 common than anticipated in the genome, and that transcripts encoding these escape elements  
86 may also function as viral restriction factors.

87

## 88 **RESULTS**

### 89 **Comparative RNA-seq identifies a cluster of common escaping transcripts**

90 Prior analyses indicated that certain host mRNA transcripts robustly escape viral-induced  
91 RNA decay by encoding an RNA element in their 3'UTRs. We demonstrated that this RNA  
92 element, herein referred to as SRE (**SOX Resistance Element**), provides protection against  
93 KSHV SOX as well as a variety of viral endonucleases. To identify mRNA transcripts containing  
94 SRE or SRE-like elements, we performed comparative RNA-seq based transcriptomics  
95 analyses upon expression of the herpesviral RNA endonucleases. Pure populations of cells  
96 expressing either KSHV SOX, MHV68 muSOX, Epstein-Barr Virus (EBV) BGLF5, Herpes  
97 Simplex 1 (HSV-1) vhs or an empty vector control were generated using Thy1.1-based cell  
98 sorting as described before (45). Total RNA was extracted, polyA enriched and cDNA were  
99 generated. cDNA libraries were sequenced with a 100-base single-end read on an Illumina  
100 HiSeq4000. Resulting reads were aligned to the human genome (hg38) using Bowtie, replicates  
101 were merged using CuffCompare and significant expression fold change between mock and  
102 each of the endonuclease conditions were assessed by CuffDiff (**Figure 1, Figure S1 & Table**  
103 **S1**). The reproducibility between replicate experiments was high (**Fig. 1A-D**), which is in line  
104 with previous reports showing that these endonucleases target transcripts in a  
105 selective/sequence-specific manner as previously observed (13). As expected, a number of  
106 transcripts were significantly affected upon expression of the various herpesviral endonucleases  
107 (**Fig. S1**): we observed that between 55-60% of total mRNA were degraded, with muSOX being  
108 the most effective of the endonucleases tested here (**Fig. S1**). This rate of degradation is within  
109 range of what was observed before (16). Gene Ontology (GO) analysis on the transcripts  
110 spared from degradation revealed that they encode proteins that have a wide array of functions,  
111 ranging from ion binding to RNA binding (**Fig S2**).

112 To identify transcripts that escape degradation from all 4 endonucleases, we performed  
113 hierarchical clustering on the transcript expression data. **Figure 1E** shows a heatmap of the  
114 correlation matrix across all transcripts. A cluster encompassing 75 transcripts (**Table S2**)  
115 represents the mRNA that escape degradation from all 4 herpesviral endonucleases. We  
116 hypothesize that this cluster of transcripts is likely to include mRNA containing SRE or SRE-like  
117 elements.

118

### 119 **Candidate escapees are broadly protected from cleavage by viral but not cellular** 120 **endonucleases**

121 We next set out to investigate further this cluster of common escapees. The RNA-seq hits  
122 identified by hierarchical clustering were ranked by confidence (reproducibility among  
123 experimental replicates and escaped all endonucleases in all replicates). To confirm the RNA-  
124 seq data, we first examined whether the top 10% (**Table S2**) of this list of common escapees  
125 were resistant to host shutoff upon lytic reactivation of a KSHV-positive renal carcinoma cell line  
126 stably expressing the KSHV BAC16 (iSLK.219). iSLK.219 cells harbor a doxycycline (dox)-  
127 inducible version of the major viral lytic transactivator RTA which promotes entry into the lytic  
128 cycle upon doxycycline treatment (46,47). As opposed to the housekeeping gene GAPDH that is  
129 naturally susceptible to host shutoff, we observed that the mRNA levels of these candidate  
130 SRE-bearing mRNAs remained unchanged in reactivated iSLK.219 cells as measured by RT-  
131 qPCR (**Fig. 2A**) confirming that these transcripts are resistant to host shutoff in lytically infected  
132 cells. Additionally, we recently showed that SRE-containing transcripts are resistant to  
133 endonucleases beyond the herpesvirus family (19). We next tested the ability of these novel  
134 escapees to evade the heterologous host shutoff from the influenza A virus endonuclease (IAV;  
135 PA-X). As shown in **Figure 2B**, contrary to GAPDH, the candidate transcripts were resistant to  
136 all endonucleases tested, including PA-X. Finally, one characteristic of SRE-containing mRNAs

137 is that they are still susceptible to cleavage by cellular endonucleases (19). To test whether this  
138 was also the case for our novel candidate SRE-bearing transcripts, we monitored cleavage  
139 upon expression of the nsp1 protein from SARS coronavirus. Nsp1 is not a nuclease but rather  
140 activates mRNA cleavage by an as yet unknown cellular endonuclease *via* a mechanism  
141 reminiscent of no-go decay (48,49). Nsp1 thus allows us to induce RNA decay using a viral  
142 trigger but carried out by a cellular endonuclease. Nsp1 was transfected into 293T cells and  
143 depletion of the candidate transcripts was measured by RT-qPCR. Similar to what we observed  
144 before, the candidate escapee mRNAs were not protected in nsp1-expressing cells (**Fig. 2C**).  
145 Collectively, these results suggest that the escaping mRNAs identified in our comparative RNA-  
146 seq dataset are broadly protected against viral but not cellular endonucleases and we predict  
147 that these transcripts may contain an SRE or an SRE-like element that provides broad  
148 protection.

149

### 150 **The C19ORF66 mRNA 3' UTR contains an SRE**

151 The pool of escaping transcripts did not appear to be strongly enriched for particular  
152 functions or processes when evaluated by GO-term analysis. We thus proceeded to manually  
153 mine the literature to identify functions that could be important during viral infection. We were  
154 drawn to C19ORF66 (also known as RyDEN, IRAV, and SVA-1), as it was reported to be an  
155 anti-viral interferon stimulated gene (ISG) in the context of multiple viral infections (40,43,44).  
156 Furthermore, the transcript for C19ORF66 appeared in our comparative RNA-seq as the top  
157 escapee in all the replicates and with all the endonucleases tested. We first evaluated whether  
158 this transcript contained a putative SRE-like element in its 3'UTR by testing whether it could  
159 protect the GFP mRNA, which is normally susceptible to viral endonuclease cleavage. We fused  
160 the C19ORF66 3' UTR to GFP (C19-3'UTR) and found that it was sufficient to confer protection  
161 from SOX and other viral endonucleases in transfected 293T cells (**Fig. 3A**). Thus, similar to



162 the IL-6 and GADD45B 3' UTRs, previously identified dominant escapees, C19ORF66 contains  
163 an SRE-like element in its 3'UTR that is sufficient to provide protection against a range of viral  
164 endonucleases. As we previously demonstrated, there is no significant sequence conservation  
165 between the 3'UTRs of these known dominant escapees. However, the highest similarities were  
166 located near the second half of C19ORF66 3'UTR, and RNAfold secondary structure prediction  
167 of this UTR section revealed a long stem-loop structure with a bulge in the middle, consistent  
168 with previously found SRE structures (**Fig. S3**).

169 Because C19ORF66 expression was previously shown to be increased in the context of  
170 various viral infections, we next sought to investigate its expression upon KSHV lytic reactivation  
171 when host shutoff occurs. iSLK.219 cells were reactivated and total protein harvested at various  
172 time points over the course of 96 hours. C19ORF66 expression was increased upon KSHV lytic  
173 reactivation and continued to accumulate over time (**Fig. 3B**). Various other proteins were also  
174 previously shown to change subcellular localization in response to host shutoff (45), so we  
175 proceeded to monitor C19ORF66 expression and did not find differential shuttling upon KSHV  
176 lytic reactivation (**Fig. 3C**). Thus, C19ORF66 escapes SOX degradation by encoding an SRE-  
177 like element on its 3' UTR that allows it to escape host shutoff and accumulate in lytically  
178 infected cells.

179

### 180 **C19ORF66 restricts KSHV infection**

181 Given that C19ORF66 functions as an anti-viral protein during HIV and Dengue virus  
182 infection, we hypothesized that it could also play a role during KSHV infection. We thus further  
183 investigated the role of C19ORF66 in iSLK.219 cells. The recombinant KSHV.219 virus stably  
184 maintained in these cells constitutively expresses green fluorescent protein (GFP) from the EF-1  
185 alpha promoter and can be used as a proxy for the presence of KSHV within cells. The  
186 KSHV.219 virus also encodes red fluorescent protein (RFP) under the control of the viral lytic

187 PAN promoter (**Fig. 4A**). siRNA-mediated depletion of C19ORF66 in iSLK.219 cells during  
188 latency and at 48h and 72h post-reactivation was efficient, reducing expression levels by 94.6%,  
189 97% and 97.8%, respectively (**Fig. 4B**). 72h hours post-reactivation, GFP and RFP positive cells  
190 were analyzed by fluorescence microscopy in siRNA C19ORF66-treated cells (or siRNA  
191 Control). C19ORF66 depletion resulted in a marked increase in the number of RFP positive  
192 cells (**Fig. 4C**). Conversely, overexpression of C19ORF66 in these cells (**Fig. 4D**) resulted in  
193 almost no RFP detection (**Fig. 4C**). Taken together, these results suggest that C19ORF66  
194 expression negatively regulates the progression of KSHV life cycle.

195 We next hypothesized that the reactivation defect due to C19ORF66 expression may  
196 lead to restriction of the formation of viral particles. To test this, we performed a supernatant  
197 transfer assay (**Fig. 5A**). iSLK.219 cells were treated with siRNA C19ORF66 (or control siRNA)  
198 and reactivated for 72h. Supernatants containing GFP expressing KSHV virions were collected  
199 and used to spinfect 293T cells (**Fig. 5B**). 24h later, we observed a higher number of GFP  
200 positive cells in the 293T cells infected with the supernatant coming from the iSLK.219 cells  
201 treated with the siRNA against C19ORF66. Since C19ORF66 seemed to affect important step in  
202 KSHV life cycle, we next assessed whether C19ORF66 also affects viral gene expression.  
203 Using RT-qPCR, we quantified the expression of several KSHV viral genes. Viral gene  
204 expression in KSHV unfolds as a cascade with the “early” (E) genes expressed right after lytic  
205 reactivation, followed by “delayed early” (DE) genes and finally, after viral replication, the “late”  
206 (L) genes. We harvested timepoints from 0 to 72h after iSLK.219 reactivation and measured  
207 RNA levels of genes representative of each gene class upon knock-down of C19ORF66. We  
208 observed a shift in viral gene expression with early and delayed early viral genes – but not with  
209 the late gene – which were expressed earlier and at higher levels in the C19ORF66 knocked  
210 down cells as measured by RT-qPCR (**Fig. 5C-E**). Taken together, these results suggest that

211 C19ORF66 may restrict expression of certain early viral genes which in turn results in fewer  
212 newly formed viral particles being produced by KSHV infected cells.

213

## 214 **DISCUSSION**

215 Regulation of mRNA stability has emerged as a focal point for control of the host gene  
216 expression machinery. By accelerating RNA decay, viruses can increase their access to the  
217 host translation machinery and dampen the host response to infection. RNA degradation is often  
218 driven by virally encoded endonucleases that can target a wide array of mRNA by cleaving  
219 within a specific structured element (13,15). It is estimated that up to two thirds of total mRNA  
220 are degraded upon expression of these viral endonucleases (11,13,16). While recent studies  
221 have focused on *how* these viral endonucleases target mRNA, it remains unclear how and why  
222 some mRNA transcripts can escape viral-induced RNA decay. We previously demonstrated that  
223 certain transcripts escape by possessing in their 3'UTR an RNA element that protects them from  
224 viral endonucleases, while still allowing for normal RNA decay and cellular endonuclease  
225 cleavage (19-21). This raised a number of questions regarding how common these RNA escape  
226 elements are in the host genome and how their presence impacts the viral lifecycle. Here, we  
227 reveal that a cluster of 75 host transcripts can systematically escape viral-induced  
228 endonucleolytic cleavage. We hypothesize that these may contain similar RNA escape elements  
229 as the one we previously characterized in IL-6 and GADD45B and therefore could be important  
230 regulators of the viral-host interplay. IL-6 and GADD45B escape elements (referred to as SRE  
231 and G-SRE respectively) were shown to adopt a specific secondary structure that we  
232 hypothesized to be crucial in recruiting host protein to the 3'UTR of these escaping transcripts  
233 (19). This RNA-protein protective complex appears to be composed of core proteins as well as  
234 accessory proteins that may be transcript-dependent. One future goal is thus to expand our  
235 knowledge of the known escapees by exploring the RNA-protein complexes on these newly

236 identified escaping transcripts with the hope of understanding the protein pre-requisite to  
237 forming a protective complex. More globally, determining whether such RNA elements impact  
238 RNA fate in uninfected cells will also be key in deciphering their role. To date, no such RNA  
239 elements have been found in viral genes, suggesting that this could be a cell specific  
240 mechanism that has evolved in response to viral infection.

241 No common functions were enriched in the pool of escaping transcripts, rendering it  
242 difficult to make any definite conclusion on whether these mRNAs escape degradation to benefit  
243 the host or the virus. Instead, we hypothesize that these spared mRNAs may have both pro and  
244 anti-viral functions. Furthermore, because of the large diversity of hosts infected by members of  
245 the herpesviridae, it would be interesting to investigate whether the orthologs of the escaping  
246 transcripts in other species also contain these RNA escape elements.

247 Here, we also characterized the top escaping transcript in our screen, C19ORF66.  
248 Through knock down and overexpression assays, our data indicate that C19ORF66 is restricting  
249 expression of KSHV early and delayed early genes, resulting in lower levels of viral reactivation  
250 and reduced yield of infectious viral particles. C19ORF66 is known to be upregulated in  
251 response to type I and type II IFNs (50,51) and to be upregulated in response to infection by a  
252 number of unrelated viruses (35-42). Furthermore, C19ORF66 was found to interact with the  
253 NS3 protein of Hepatitis C Virus (52), localize to the replication complex of DENV [33], and  
254 occasionally co-localize in the cytoplasmic compartment with HIV-1 Rev and Tat proteins (40),  
255 pointing to a potential conserved role for C19ORF66 as a key player in the host-pathogen  
256 response. While it is still unclear how C19ORF66 participates in the regulation of these viruses,  
257 it was hypothesized that it may be mediated through its interaction with PABPC and LARP, two  
258 major RNA binding proteins (43). PABPC and LARP were recently shown to be relocated upon  
259 SOX-induced widespread RNA decay and to be linked to the transcription feedback loop that  
260 occurs during host shutoff (45). PABPC in particular, was shown to be pivotal in triggering

261 transcriptional repression in the nucleus after host shutoff, a process that favors expression of  
262 viral genes. It is therefore possible that C19ORF66, by interacting with PABPC, slows down  
263 PABPC relocalization to nucleus and restricts expression of viral genes. By Interacting with  
264 PABPC and LARP, C19ORF66 was also hypothesized to regulate decay of Dengue RNA by  
265 possibly influencing either translation or localization to p-bodies and stress granules (53)  
266 Determining whether C19ORF66 influences the PABPC shuttling pattern is an important future  
267 goal, as well as deciphering C19ORF66 interaction pattern upon KSHV infection and lytic  
268 reactivation.

269 Past literature on C19ORF66 has attributed C19ORF66 upregulation upon viral infection  
270 to interferon signaling. KSHV encodes multiple proteins that restrict the expression of interferon  
271 stimulated genes (ISG) (54) and yet, we observed an increased in C19ORF66 expression  
272 during KSHV lytic cycle. This suggests that in addition to escaping SOX-induced mRNA decay,  
273 C19ORF66 must have a mechanism to escape the KSHV encoded ISG inhibitors. This  
274 reinforces the idea that C19ORF66 is particularly important during KSHV infection and, to date,  
275 remains the only known ISG capable of escaping virally induced widespread mRNA decay.

276 Intriguingly, the viral endonucleases tested in this study come from both related and  
277 unrelated viruses, do not share the same targeting elements on their target mRNA, and are not  
278 known to be recruited to mRNA through similar pathways. It is thus notable that within the group  
279 of common escapees was one with a conserved anti-viral role. This underscores the utility of  
280 comparative approaches towards revealing broad regulators of viral infection.

281

282 Finally, none of the 3 known SREs (in IL-6, GADD45B, and now in C19ORF66) share  
283 significant sequence similarity, although they do all share similar predicted secondary  
284 structures. Thus, as predicted before, these RNA elements may function as scaffolds for  
285 recruiting a protective protein complex. Therefore, by manipulating the sequence of these RNA

286 escape elements but maintaining the structure, these nuclease escape elements could be  
287 developed as tools to broadly inhibit viral endonucleases and open the possibility of turning  
288 these RNA elements into broad-acting anti-viral RNA therapeutics.

289

290

## 291 **MATERIALS AND METHODS**

292 **Cells and transfections.** 293T cells (ATCC) were grown in DMEM (Invitrogen) supplemented  
293 with 10% FBS. The KHSV-infected renal carcinoma cell line iSLK.219 bearing doxycycline-  
294 inducible RTA was grown in DMEM supplemented with 10% FBS (47). KSHV lytic reactivation  
295 of the iSLK.219 cells was induced by the addition of 0.2  $\mu$ g/ml doxycycline (BD Biosciences)  
296 and 110  $\mu$ g/ml sodium butyrate for 72 h.

297 For DNA transfections, cells were plated and transfected after 24h when 70% confluent  
298 using PolyJet (SignaGen). For small interfering RNA (siRNA) transfections, cells were reverse  
299 transfected in 6-well plates by INTERFERin (Polyplus-Transfection) with 10  $\mu$ M of siRNAs.  
300 siRNAs were obtained from IDT as DsiRNA (siRNA C19ORF66: hs.Ri.C19orf66.13.1).

301 Fractionation experiments were performed following the REAP method (55). Briefly, cells  
302 were washed twice with ice-cold PBS and the cell pellet was lysed in 0.1% NP-40 PBS lysis  
303 buffer. The nuclei were then isolated by differential centrifugation at 10,000 x *g* for 10 sec and  
304 the supernatant retained as the cytoplasmic fraction. For western blotting, the nuclei were  
305 sonicated in 0.1% NP-40 PBS lysis buffer.

306 Supernatant transfers were carried in iSLK.219 cells. Cells treated with siRNA were  
307 reactivated with doxycycline and sodium butyrate for 72 h, supernatants were collected, filtered  
308 to remove any potential whole cells, and spininfected onto 293T cells at 1500rpm for 1 h at 37C.  
309 24h later, cells were imaged on a fluorescent microscope.

310

311

312 **Plasmids.** The C19ORF66 3'UTR was obtained as G-blocks from IDT and cloned into a  
313 pcDNA3.1 plasmid downstream of the GFP coding sequence. The C19ORF66 coding region  
314 was obtained as a G-block from IDT and cloned in a pcDNA4 Nter-3xFlag vector. All cloning

315 step were performed using in-fusion cloning (Clonetech-takara) and were verified by  
316 sequencing.

317

318 **RT-qPCR.** Total RNA was harvested using Trizol following the manufacture's protocol. cDNAs  
319 were synthesized from 1 µg of total RNA using AMV reverse transcriptase (Promega), and used  
320 directly for quantitative PCR (qPCR) analysis with the SYBR green qPCR kit (Bio-Rad). Signals  
321 obtained by qPCR were normalized to 18S.

322

323 **Western Blotting.** Cell lysates were prepared in lysis buffer (NaCl 150mM, Tris 50mM, NP40  
324 0.5%, DTT 1mM and protease inhibitor tablets) and quantified by Bradford assay. Equivalent  
325 amounts of each sample were resolved by SDS-PAGE and western blotted with the following  
326 antibodies at 1:1000 in TBST (Tris-buffered saline, 0.1% Tween 20): rabbit anti-C19ORF66  
327 (Abcam) rabbit anti-DHX9/RNA Helicase A (Abcam), rabbit anti-GAPDH (Abcam). Primary  
328 antibody incubations were followed by HRP-conjugated goat anti-mouse or goat anti-rabbit  
329 secondary antibodies (Southern Biotechnology, 1:5000).

330

331 **RNA-seq.** Cells were transfected with constructs encoding fusion proteins between the  
332 herpesviral endonucleases (SOX, muSOX, BGLF5 and vhs) and the cell surface receptor  
333 Thy1.1 (CD90.1). Pure populations of cells expressing the endonucleases were obtained as  
334 describe before (45). Briefly, cells expressing the surface marker Thy1.1 were separated using  
335 the Miltenyi Biotec MACS cell separation system: transfected cells were incubated with anti-  
336 CD90.1 microbeads on ice for 15 min and magnetically separated according to the  
337 manufacturer's instructions. RNA was then extracted from Thy1.1 positive cells by Trizol and  
338 purified as described above. Purity and integrity was assessed by bioanalyzer. After polyA  
339 selection, libraries were subjected to single-end sequencing on a HiSeq 4000. Read quality was



340 assessed using fastqc. Using Galaxy (56), reads were then aligned to the human genome  
341 (hg38) by Bowtie2 and differential expression analysis were performed using Cufflink and  
342 Cuffdiff (57). For graphical representation in the heatmap, fold change values were saturated by  
343 an hyperbolic tan function with a cutoff set at 10. Hierarchical clustering was generated in  
344 Python using the SciPy package with complete linkage and Euclidian distance.

345

346 **Statistical analysis.** All results are expressed as means  $\pm$  S.E.M. of experiments independently  
347 repeated at least three times. Unpaired Student's t test was used to evaluate the statistical  
348 difference between samples. Significance was evaluated with P values as follows: \*  $p < 0.05$ ; \*\*  
349  $p < 0.01$ ; \*\*\*  $p < 0.001$ .

350

351

352

353

## 354 **ACKNOWLEDGMENTS**

355 We thank all members of the Muller Lab for their insights. We are grateful to the Glaunsinger lab  
356 for helpful discussions and to Ella Hartenian and Sarah Gilbertson for technical help with the  
357 Thy1.1 constructs. We would also like to thank Dr. Romain Vasseur for help with Python.

358

## 359 **FUNDING**

360 This research was supported by the UMass Microbiology Startup funds to MM and a University  
361 Fellowship in Microbiology to WR.

362

363

364

365 **REFERENCES**

- 366
- 367 1. Gaglia MM, Covarrubias S, Wong W, Glaunsinger BA. A common strategy for host RNA  
368 degradation by divergent viruses. *J Virol.* 2012 Sep;86(17):9527–30.
- 369 2. Rivas HG, Schmaling SK, Gaglia MM. Shutoff of Host Gene Expression in Influenza A  
370 Virus and Herpesviruses: Similar Mechanisms and Common Themes. *Viruses.*  
371 2016;8(4):102.
- 372 3. Jagger BW, Wise HM, Kash JC, Walters K-A, Wills NM, Xiao Y-L, et al. An overlapping  
373 protein-coding region in influenza A virus segment 3 modulates the host response.  
374 *Science.* 2012 Jul 13;337(6091):199–204.
- 375 4. Kwong AD, Frenkel N. Herpes simplex virus-infected cells contain a function(s) that  
376 destabilizes both host and viral mRNAs. *Proc Natl Acad Sci USA.* 1987 Apr;84(7):1926–  
377 30.
- 378 5. Kamitani W, Huang C, Narayanan K, Lokugamage KG, Makino S. A two-pronged strategy  
379 to suppress host protein synthesis by SARS coronavirus Nsp1 protein. *Nat Struct Mol*  
380 *Biol.* 2009 Nov;16(11):1134–40.
- 381 6. Abernathy E, Glaunsinger B. Emerging roles for RNA degradation in viral replication and  
382 antiviral defense. *Virology.* 2015 May;479-480:600–8.
- 383 7. Gaglia MM, Glaunsinger BA. *Viruses and the cellular RNA decay machinery.* Wiley  
384 *Interdiscip Rev RNA.* 2010 Jul;1(1):47–59.
- 385 8. Covarrubias S, Richner JM, Clyde K, Lee YJ, Glaunsinger BA. Host shutoff is a conserved  
386 phenotype of gammaherpesvirus infection and is orchestrated exclusively from the  
387 cytoplasm. *J Virol.* 2009 Sep;83(18):9554–66.
- 388 9. Rowe M, Glaunsinger B, van Leeuwen D, Zuo J, Sweetman D, Ganem D, et al. Host  
389 shutoff during productive Epstein-Barr virus infection is mediated by BGLF5 and may  
390 contribute to immune evasion. *Proc Natl Acad Sci USA.* 2007 Feb 27;104(9):3366–71.
- 391 10. Glaunsinger B, Ganem D. Lytic KSHV infection inhibits host gene expression by  
392 accelerating global mRNA turnover. *Mol Cell.* 2004 Mar 12;13(5):713–23.
- 393 11. Abernathy E, Clyde K, Yeasmin R, Krug LT, Burlingame A, Coscoy L, et al.  
394 Gammaherpesviral gene expression and virion composition are broadly controlled by  
395 accelerated mRNA degradation. *PLoS Pathog.* 2014 Jan;10(1):e1003882.
- 396 12. Richner JM, Clyde K, Pezda AC, Cheng BYH, Wang T, Kumar GR, et al. Global mRNA  
397 degradation during lytic gammaherpesvirus infection contributes to establishment of viral  
398 latency. *PLoS Pathog.* 2011 Jul;7(7):e1002150.
- 399 13. Gaglia MM, Rycroft CH, Glaunsinger BA. Transcriptome-Wide Cleavage Site Mapping on  
400 Cellular mRNAs Reveals Features Underlying Sequence-Specific Cleavage by the Viral  
401 Ribonuclease SOX. *PLoS Pathog.* 2015 Dec;11(12):e1005305.
- 402 14. Covarrubias S, Gaglia MM, Kumar GR, Wong W, Jackson AO, Glaunsinger BA.

- 403 Coordinated destruction of cellular messages in translation complexes by the  
404 gammaherpesvirus host shutoff factor and the mammalian exonuclease Xrn1. *PLoS*  
405 *Pathog.* 2011 Oct;7(10):e1002339.
- 406 15. Mendez AS, Vogt C, Bohne J, Glaunsinger BA. Site specific target binding controls RNA  
407 cleavage efficiency by the Kaposi's sarcoma-associated herpesvirus endonuclease SOX.  
408 *Nucleic Acids Res.* 2018 Oct 13;46(22):11968–79.
- 409 16. Clyde K, Glaunsinger BA. Deep sequencing reveals direct targets of gammaherpesvirus-  
410 induced mRNA decay and suggests that multiple mechanisms govern cellular transcript  
411 escape. *PLoS ONE.* 2011;6(5):e19655.
- 412 17. Chandriani S, Ganem D. Host transcript accumulation during lytic KSHV infection reveals  
413 several classes of host responses. *PLoS ONE.* 2007 Aug 29;2(8):e811.
- 414 18. Glaunsinger B, Ganem D. Highly selective escape from KSHV-mediated host mRNA  
415 shutoff and its implications for viral pathogenesis. *J Exp Med.* 2004 Aug 2;200(3):391–8.
- 416 19. Muller M, Glaunsinger BA. Nuclease escape elements protect messenger RNA against  
417 cleavage by multiple viral endonucleases. *PLoS Pathog.* 2017 Aug;13(8):e1006593.
- 418 20. Muller M, Hutin S, Marigold O, Li KH, Burlingame A, Glaunsinger BA. A ribonucleoprotein  
419 complex protects the interleukin-6 mRNA from degradation by distinct herpesviral  
420 endonucleases. *PLoS Pathog.* 2015 May;11(5):e1004899.
- 421 21. Hutin S, Lee Y, Glaunsinger BA. An RNA element in human interleukin 6 confers escape  
422 from degradation by the gammaherpesvirus SOX protein. *J Virol.* 2013 Apr;87(8):4672–  
423 82.
- 424 22. Clyde K, Glaunsinger BA. Getting the message direct manipulation of host mRNA  
425 accumulation during gammaherpesvirus lytic infection. *Adv Virus Res.* 2010;78:1–42.
- 426 23. Lee YJ, Glaunsinger BA. Aberrant herpesvirus-induced polyadenylation correlates with  
427 cellular messenger RNA destruction. *PLoS Biol.* 2009 May 5;7(5):e1000107.
- 428 24. Abernathy E, Gilbertson S, Alla R, Glaunsinger B. Viral Nucleases Induce an mRNA  
429 Degradation-Transcription Feedback Loop in Mammalian Cells. *Cell Host Microbe.* 2015  
430 Aug 12;18(2):243–53.
- 431 25. Sin S-H, Roy D, Wang L, Staudt MR, Fakhari FD, Patel DD, et al. Rapamycin is  
432 efficacious against primary effusion lymphoma (PEL) cell lines in vivo by inhibiting  
433 autocrine signaling. *Blood.* 2007 Mar 1;109(5):2165–73.
- 434 26. Miles SA, Rezai AR, Salazar-González JF, Vander Meyden M, Stevens RH, Logan DM, et  
435 al. AIDS Kaposi sarcoma-derived cells produce and respond to interleukin 6. *Proc Natl*  
436 *Acad Sci USA.* 1990 Jun;87(11):4068–72.
- 437 27. Screpanti I, Musiani P, Bellavia D, Cappelletti M, Aiello FB, Maroder M, et al. Inactivation  
438 of the IL-6 gene prevents development of multicentric Castleman's disease in C/EBP  
439 beta-deficient mice. *J Exp Med.* 1996 Oct 1;184(4):1561–6.

- 440 28. Leger-Ravet MB, Peuchmaur M, Devergne O, Audouin J, Raphael M, Van Damme J, et  
441 al. Interleukin-6 gene expression in Castleman's disease. *Blood*. 1991 Dec  
442 1;78(11):2923–30.
- 443 29. Xie J, Pan H, Yoo S, Gao S-J. Kaposi's sarcoma-associated herpesvirus induction of AP-  
444 1 and interleukin 6 during primary infection mediated by multiple mitogen-activated protein  
445 kinase pathways. *J Virol*. 2005 Dec;79(24):15027–37.
- 446 30. An J, Sun Y, Sun R, Rettig MB. Kaposi's sarcoma-associated herpesvirus encoded vFLIP  
447 induces cellular IL-6 expression: the role of the NF-kappaB and JNK/AP1 pathways.  
448 *Oncogene*. 2003 May 29;22(22):3371–85.
- 449 31. Santarelli R, Gonnella R, Di Giovenale G, Cuomo L, Capobianchi A, Granato M, et al.  
450 STAT3 activation by KSHV correlates with IL-10, IL-6 and IL-23 release and an  
451 autophagic block in dendritic cells. *Sci Rep*. 2014 Feb 28;4(1):4241.
- 452 32. Deng H, Chu JT, Rettig MB, Martinez-Maza O, Sun R. Rta of the human herpesvirus  
453 8/Kaposi sarcoma-associated herpesvirus up-regulates human interleukin-6 gene  
454 expression. *Blood*. 2002 Sep 1;100(5):1919–21.
- 455 33. McCormick C, Ganem D. The kaposin B protein of KSHV activates the p38/MK2 pathway  
456 and stabilizes cytokine mRNAs. *Science*. 2005 Feb 4;307(5710):739–41.
- 457 34. Liu X, Happel C, Ziegelbauer JM. Kaposi's Sarcoma-Associated Herpesvirus MicroRNAs  
458 Target GADD45B To Protect Infected Cells from Cell Cycle Arrest and Apoptosis.  
459 Longnecker RM, editor. *J Virol*. 2017 Feb 1;91(3):e02045–16.
- 460 35. Gaucher D, Therrien R, Kettaf N, Angermann BR, Boucher G, Filali-Mouhim A, et al.  
461 Yellow fever vaccine induces integrated multilineage and polyfunctional immune  
462 responses. *J Exp Med*. 2008 Dec 22;205(13):3119–31.
- 463 36. Harvey SAK, Romanowski EG, Yates KA, Gordon YJ. Adenovirus-directed ocular innate  
464 immunity: the role of conjunctival defensin-like chemokines (IP-10, I-TAC) and phagocytic  
465 human defensin-alpha. *Invest Ophthalmol Vis Sci*. 2005 Oct;46(10):3657–65.
- 466 37. Wang J, Nikrad MP, Phang T, Gao B, Alford T, Ito Y, et al. Innate immune response to  
467 influenza A virus in differentiated human alveolar type II cells. *Am J Respir Cell Mol Biol*.  
468 2011 Sep;45(3):582–91.
- 469 38. Zapata JC, Carrion R, Patterson JL, Crasta O, Zhang Y, Mani S, et al. Transcriptome  
470 analysis of human peripheral blood mononuclear cells exposed to Lassa virus and to the  
471 attenuated Mopeia/Lassa reassortant 29 (ML29), a vaccine candidate. Geisbert T, editor.  
472 *PLoS Negl Trop Dis*. 2013;7(9):e2406.
- 473 39. Kash JC, Mühlberger E, Carter V, Grosch M, Perwitasari O, Proll SC, et al. Global  
474 suppression of the host antiviral response by Ebola- and Marburgviruses: increased  
475 antagonism of the type I interferon response is associated with enhanced virulence. *J*  
476 *Virol*. 2006 Mar;80(6):3009–20.
- 477 40. Xiong W, Contreras D, Ignatius Irudayam J, Ali A, Yang OO, Arumugaswami V.  
478 C19ORF66 is an Interferon-Stimulated Gene (ISG) which Inhibits Human

- 479 Immunodeficiency Virus-1. 2016.
- 480 41. Bull TM, Meadows CA, Coldren CD, Moore M, Sotto-Santiago SM, Nana-Sinkam SP, et  
481 al. Human herpesvirus-8 infection of primary pulmonary microvascular endothelial cells.  
482 *Am J Respir Cell Mol Biol*. 2008 Dec;39(6):706–16.
- 483 42. Miyazaki D, Haruki T, Takeda S, Sasaki S-I, Yakura K, Terasaka Y, et al. Herpes simplex  
484 virus type 1-induced transcriptional networks of corneal endothelial cells indicate antigen  
485 presentation function. *Invest Ophthalmol Vis Sci*. 2011 Jun 16;52(7):4282–93.
- 486 43. Suzuki Y, Chin W-X, Han Q, Ichiyama K, Lee CH, Eyo ZW, et al. Characterization of  
487 RyDEN (C19orf66) as an Interferon-Stimulated Cellular Inhibitor against Dengue Virus  
488 Replication. Rice CM, editor. *PLoS Pathog*. 2016 Jan;12(1):e1005357.
- 489 44. Balinsky CA, Schmeisser H, Wells AI, Ganesan S, Jin T, Singh K, et al. IRAV (FLJ11286),  
490 an Interferon-Stimulated Gene with Antiviral Activity against Dengue Virus, Interacts with  
491 MOV10. Diamond MS, editor. *J Virol*. 2017 Mar 1;91(5):504.
- 492 45. Gilbertson S, Federspiel JD, Hartenian E, Cristea IM, Glaunsinger B. Changes in mRNA  
493 abundance drive shuttling of RNA binding proteins, linking cytoplasmic RNA degradation  
494 to transcription. *Elife*. 2018 Oct 3;7:243.
- 495 46. Nakamura H, Lu M, Gwack Y, Souvlis J, Zeichner SL, Jung JU. Global changes in  
496 Kaposi's sarcoma-associated virus gene expression patterns following expression of a  
497 tetracycline-inducible Rta transactivator. *J Virol*. 2003 Apr;77(7):4205–20.
- 498 47. Myoung J, Ganem D. Generation of a doxycycline-inducible KSHV producer cell line of  
499 endothelial origin: maintenance of tight latency with efficient reactivation upon induction. *J*  
500 *Virol Methods*. 2011 Jun;174(1-2):12–21.
- 501 48. Narayanan K, Ramirez SI, Lokugamage KG, Makino S. Coronavirus nonstructural protein  
502 1: Common and distinct functions in the regulation of host and viral gene expression.  
503 *Virus Res*. 2015 Apr 16;202:89–100.
- 504 49. Huang C, Lokugamage KG, Rozovics JM, Narayanan K, Semler BL, Makino S. SARS  
505 coronavirus nsp1 protein induces template-dependent endonucleolytic cleavage of  
506 mRNAs: viral mRNAs are resistant to nsp1-induced RNA cleavage. Baric RS, editor.  
507 *PLoS Pathog*. 2011 Dec;7(12):e1002433.
- 508 50. Schoggins JW, Wilson SJ, Panis M, Murphy MY, Jones CT, Bieniasz P, et al. A diverse  
509 range of gene products are effectors of the type I interferon antiviral response. *Nature*.  
510 2011 Apr 28;472(7344):481–5.
- 511 51. Schmeisser H, Mejido J, Balinsky CA, Morrow AN, Clark CR, Zhao T, et al. Identification  
512 of alpha interferon-induced genes associated with antiviral activity in Daudi cells and  
513 characterization of IFIT3 as a novel antiviral gene. *J Virol*. 2010 Oct;84(20):10671–80.
- 514 52. de Chasse B, Navratil V, Tafforeau L, Hiet MS, Aublin-Gex A, Agaugué S, et al. Hepatitis  
515 C virus infection protein network. *Mol Syst Biol*. 2008;4:230.
- 516 53. Takahashi H, Suzuki Y. Cellular Control of Dengue Virus Replication: Role of Interferon-

- 517 Inducible Genes. In: Dengue - Immunopathology and Control Strategies. InTech; 2017.
- 518 54. Dittmer DP, Damania B. Kaposi sarcoma-associated herpesvirus: immunobiology,  
519 oncogenesis, and therapy. *J Clin Invest*. 2016 Sep 1;126(9):3165–75.
- 520 55. Nabbi A, Riabowol K. Rapid Isolation of Nuclei from Cells In Vitro. *Cold Spring Harb*  
521 *Protoc*. 2015 Aug 3;2015(8):769–72.
- 522 56. Afgan E, Baker D, Batut B, van den Beek M, Bouvier D, Cech M, et al. The Galaxy  
523 platform for accessible, reproducible and collaborative biomedical analyses: 2018 update.  
524 *Nucleic Acids Res*. 2018 Jul 2;46(W1):W537–44.
- 525 57. Trapnell C, Hendrickson DG, Sauvageau M, Goff L, Rinn JL, Pachter L. Differential  
526 analysis of gene regulation at transcript resolution with RNA-seq. *Nat Biotechnol*. 2013  
527 Jan;31(1):46–53.

528

529

530

531 **FIGURES**

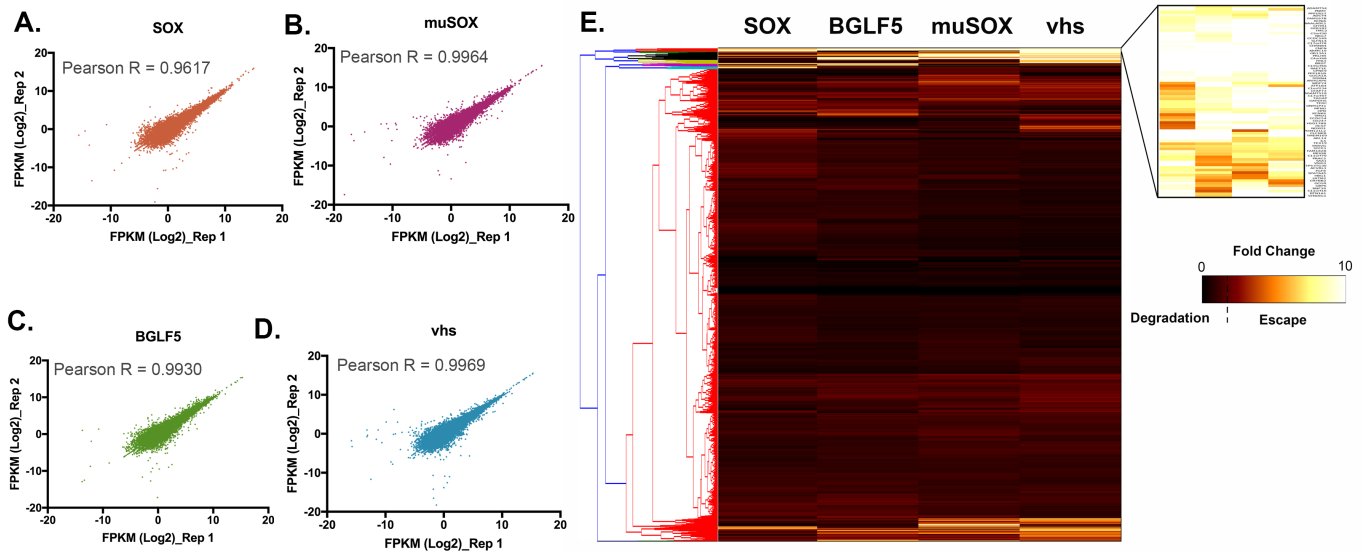

532

533 **Figure 1: Comparative RNA-seq of the herpesviral RNA endonuclease. (A-D)** Scatter plots  
534 to compare gene expression expressed as  $\log_2$  FPKM (Fragments Per Kilobase of transcript per  
535 Million mapped reads) amongst replicate experiments. The Pearson correlation coefficient, R, is  
536 shown for each plot. **(E)** Hierarchical clustering and heatmap of RNA-seq data: Fold change in  
537 expression levels for each condition (SOX, muSOX, BGLF5 and vhs – columns) over mock  
538 were normalized are represented as a heatmap. Transcripts were clustered by similarity using  
539 the complete linkage method (dendrogram on the left). A cluster representing transcript escaping  
540 degradation by all tested endonucleases emerged and is enlarged on the top right corner.

541

542

543

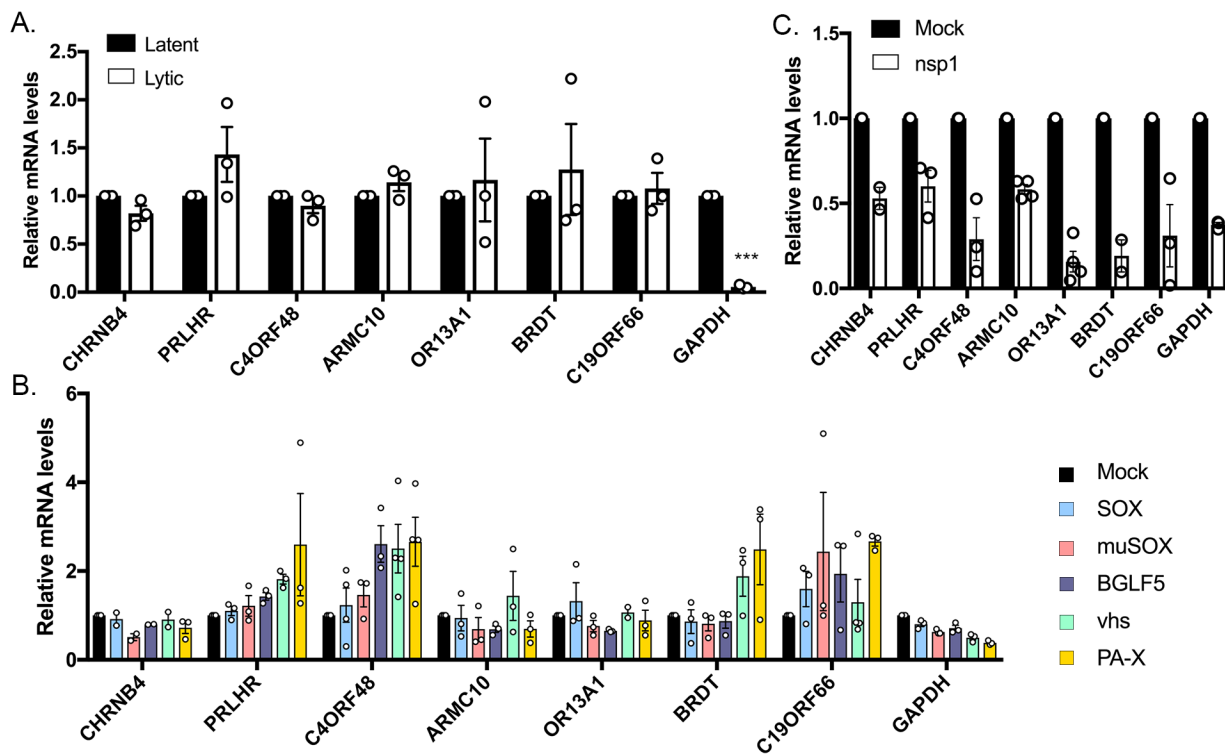

544

545 **Figure 2: Top escapees identified by RNA-seq behave like SRE-containing transcripts. (A)**

546 Total RNA was extracted from unreactivated or reactivated KSHV-positive iSLK.219 cells and  
 547 subjected to RT-qPCR to measure endogenous levels of the top candidates identified by RNA-  
 548 seq. **(B)** 293T cells were transfected with an empty vector (Mock) or a plasmid expressing each  
 549 of the viral endonucleases color coded on the right. After 24 h, total RNA was harvested and  
 550 subjected to RT-qPCR to measure endogenous RNA levels. **(C)** 293T cells were transfected  
 551 with an empty vector (Mock) or a plasmid expressing nsp1. After 24 h, total RNA was harvested  
 552 and subjected to RT-qPCR to measure endogenous RNA levels.

553



554

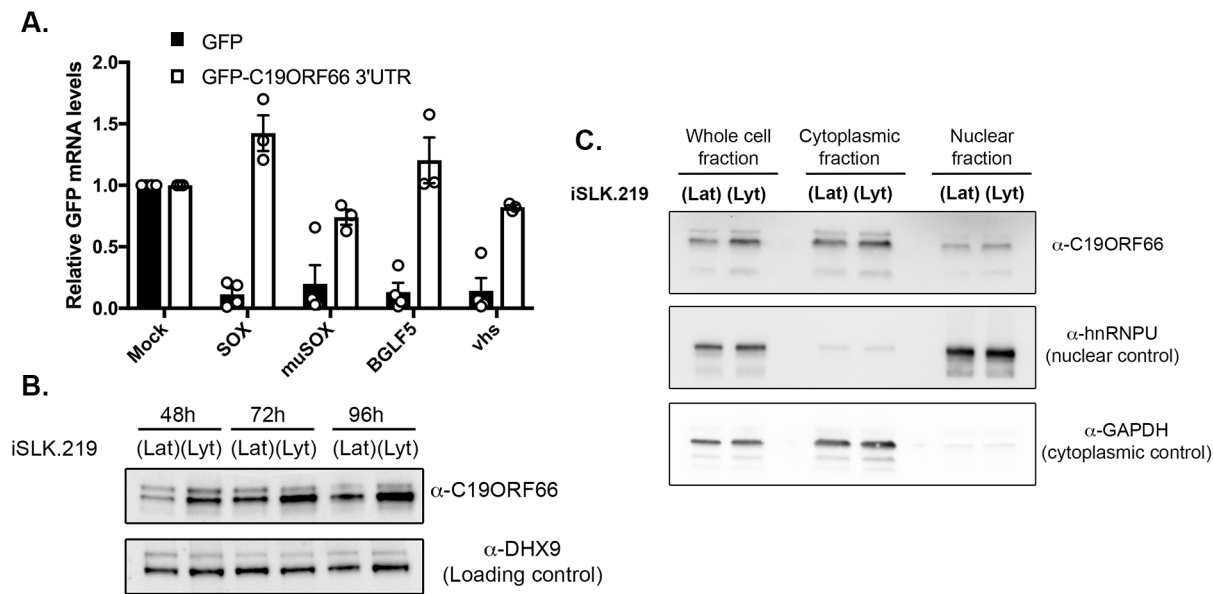

555

556 **Figure 3: C19ORF66 mRNA is protected from herpesviral endonucleases by its 3'UTR and**  
 557 **accumulates in the cytoplasm of iSLK.219 cells. (A)** 293T cells were transfected with the  
 558 indicated GFP reporter (GFP) or a GFP reporter containing C19ORF66 3'UTR sequence along  
 559 with a control empty vector (mock) or a plasmid expressing SOX, muSOX, BGLF5 or vhs. After  
 560 24 h, total RNA was harvested and subjected to RT-qPCR to measure GFP mRNA levels. **(B)**  
 561 KSHV-positive iSLK.219 cells were reactivated for the indicated times to induce KSHV lytic  
 562 cycle (lyt) or not (KSHV latent phase maintained - lat). Cells were harvest, lysed, resolved on  
 563 SDS-PAGE and western blotted for the indicated antibodies. **(C)** Unreactivated (lat) or  
 564 reactivated (lyt) KSHV-positive iSLK.219 cells were fractionated into nuclear and cytoplasmic  
 565 fractions, and Western blotted for the indicated antibodies.

566

567

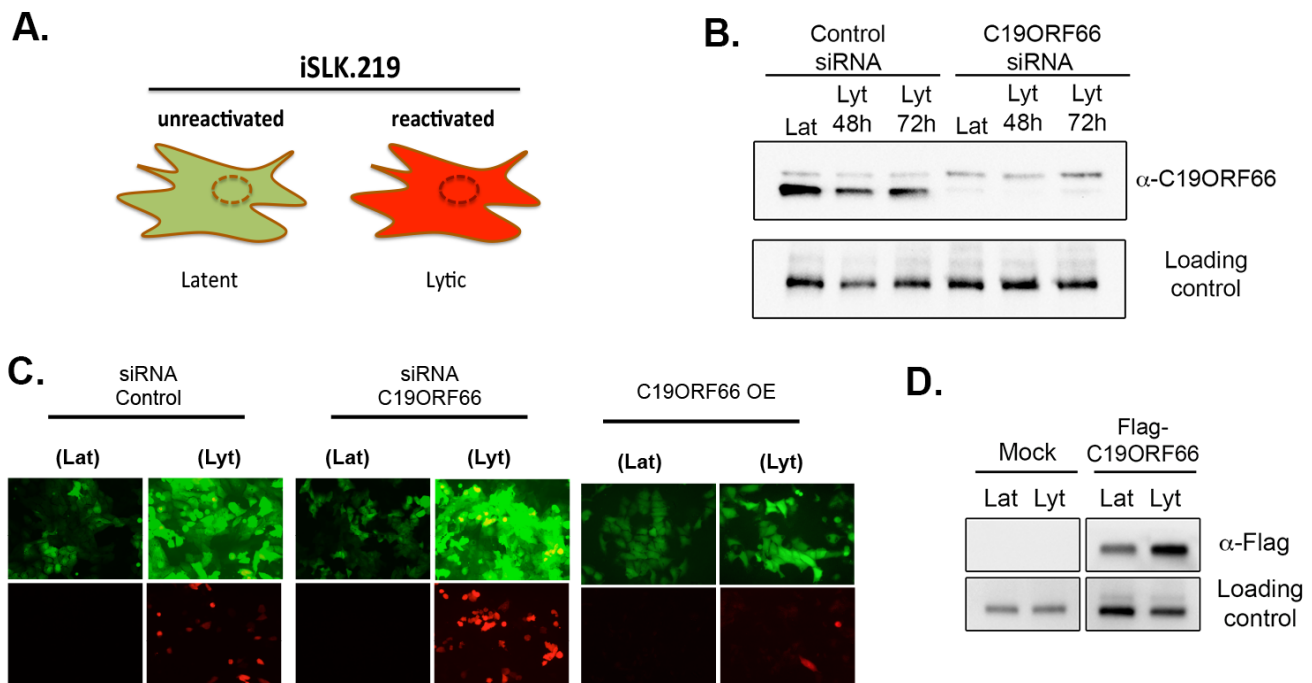

568

569 **Figure 4: C19ORF66 restrict KSHV reactivation.** (A) Diagram outlining the fluorescence  
 570 pattern of iSLK.219 cells. (B & D) iSLK.219 cells were either treated with siRNAs targeting  
 571 C19ORF66 (or control non-target siRNAs) for 48h (B) or transfected with a Flag tagged  
 572 C19ORF66 (D). Cells were then reactivated with doxycycline and sodium butyrate, lysed, and  
 573 lysates were resolved on SDS-PAGE and western blotted with the indicated antibodies. (C)  
 574 Cells treated with the indicated siRNA or transfected with C19ORF66 (Overexpression - OE)  
 575 were checked for reactivation efficiency by monitoring the expression of GFP and RFP.

576

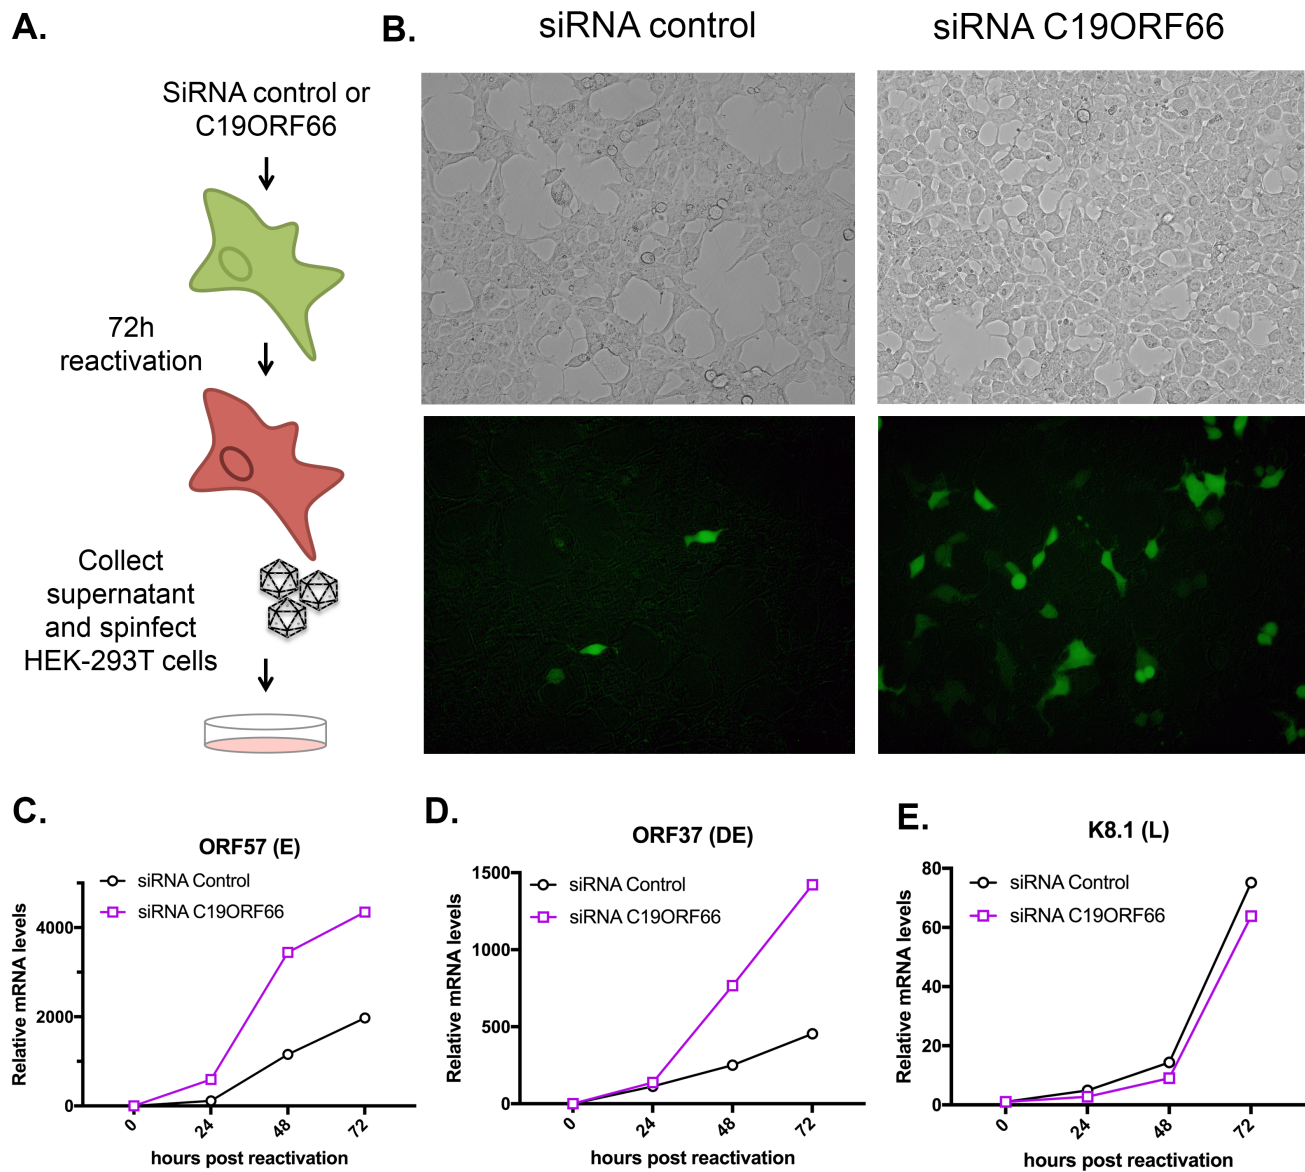

577

578

579 **Figure 5: C19ORF66 knock down results in higher viral production yield and higher viral**  
 580 **gene expression levels.** (A) diagram depicting the supernatant transfer assay. (B)  
 581 Supernatant transfer assay was used as a proxy for virion production and performed as  
 582 described in A. Infection of 293T cells was monitored by imaging GFP on a fluorescent  
 583 microscope. (C-E) Total RNA was extracted from iSLK.219 cells treated with siRNAs targeting  
 584 C19ORF66 (or control non-target siRNAs) for 48h and reactivated for the indicated times. RNA  
 585 was then subjected to RT-qPCR to quantify expression of the indicated viral genes.

586

587

## 588 SUPPORTING INFORMATION

589 **Figure S1:** (Left) Volcano plot of all genes differentially expressed in Mock samples vs.  
590 Endonuclease expressing cells. Dots represent fold change and p-values as determined by  
591 CuffDiff. Significant fold change ( $-\log_{10}(p\_value)$  of 0.001 and under) are highlighted in red.  
592 (Right) Distribution of fold change per endonuclease tested over mock sample and  
593 corresponding percentages on degrading transcripts.

594 **Figure S2:** Gene Ontology (GO) analyses performed using the Gene Ontology Consortium  
595 algorithm (<http://www.geneontology.org>) recapitulating the enriched functions found in the pool  
596 of escaping mRNAs per condition. The color scale represents the p-value of each GO term as  
597 assessed by the algorithm.

598 **Figure S3:** Sequence alignment and comparison of structure predictions obtained with RNAfold  
599 for C19ORF66 3'UTR with other known SRE transcripts: IL-6 and GADD45B.

600 **Table S1:** RNA-seq dataset. Summary table combining transcript ID and FPKM scores per  
601 condition (Mock sample, SOX, muSOX, BGLF5 and vhs).

602 **Table S2:** List of mRNA escaping all endonucleases tested by comparative RNA-seq as  
603 identified by hierarchical clustering. Each tab in this table represent the fold change over mock  
604 sample for each herpesviral endonuclease. Highlighted in yellow are the transcripts selected as  
605 top 10% for further investigation.

606
